# Supplementary material for: Spray-Induced Silencing of Pathogenicity Gene MoDES1 via Exogenous Double-Stranded RNA Can Confer Partial Resistance Against Fungal Blast in Rice
Source: PubMed Central journal article supplement (PMC8662628; doi:10.3389/fpls.2021.733129), 2021-11-26
Supplement: Data_Sheet_1.pdf [file Data_Sheet_1.pdf]

| <b>(A) Strain</b>                                                               | <b>Accession</b>  | <b>Query</b>   | <b>%age nucleotide similarity</b> | <b>Natural host</b>                              |
|---------------------------------------------------------------------------------|-------------------|----------------|-----------------------------------|--------------------------------------------------|
| <i>Pyricularia oryzae</i><br>70-15<br>uncharacterized<br>protein<br>(MGG_04163) | XM_003719617.1    | 100            | 100                               | <i>Oryza sativa</i><br>(Rice)                    |
| <i>Pyricularia oryzae</i><br>isolate MZ5-1-6                                    | CP034209.1        | 100            | 99.64%                            | <i>Elusine coracana</i><br>(Finger millet)       |
| <i>Pyricularia oryzae</i><br>strain LpKY97                                      | CP050925.1        | 100            | 99.64%                            | <i>Lolium perenne</i><br>(Perennial<br>ryegrass) |
| <i>Pyricularia oryzae</i><br>strain B71                                         | CP060335.1        | 100            | 99.64%                            | <i>Triticum<br/>aestivum</i><br>(Wheat)          |
| <b>(B) Species</b>                                                              | <b>Locus Name</b> | <b>E-value</b> | <b>Sequence identity</b>          | <b>BLAST result</b>                              |
| <i>Podospora<br/>anserina</i>                                                   | Pa_6_2820         | 0              | 51.59%                            | No significant<br>similarity                     |
| <i>Chaetomium<br/>globosum</i>                                                  | CHG04628.1        | 0              | 52.29%                            | No significant<br>similarity                     |
| <i>Neurospora crassa</i>                                                        | NCU07707.2        | 0              | 50.18%                            | No significant<br>similarity                     |
| <i>Fusarium<br/>oxysporum</i>                                                   | FOXG_08291        | 0              | 50.07%                            | No significant<br>similarity                     |

|                             |              |   |        |                           |
|-----------------------------|--------------|---|--------|---------------------------|
| <i>Fusarium graminearum</i> | FGSG_09765.3 | 0 | 49.80% | No significant similarity |
| <i>Botrytis cinerea</i>     | BC1G_03084.1 | 0 | 44.74% | No significant similarity |

**Supplementary Table 1. BLAST analysis of Sequence homology for checking specificity of *MoDES1* target sequence.** (A) BLASTn analysis of *MoDES1* target sequence across *Magnaporthe oryzae* genome, showing hits obtained from different strains, their hosts and percentage sequence identity with maximum Query coverage for individual hits. (B) BLAST analysis of *MoDES1* target sequence across the *DES1* homologs from Pezizomycetes members that showed >44% sequence similarity (Chi et al., 2009).

|   | Name of Primers          | Purpose                                                | Sequence<br>(5' → 3')                                 |
|---|--------------------------|--------------------------------------------------------|-------------------------------------------------------|
| 1 | <i>GFP</i> FP            | Probe generation                                       | CACTGGAGTTGTCCCAATTC                                  |
| 2 | <i>GFP</i> RP            | Probe generation                                       | CGTGTCTTGTAGTTCCCGTC                                  |
| 3 | <i>GFP</i> FP Sense      | Template preparation for <i>In vitro</i> transcription | <u>GAAATTAATACGACTCACTATAGGGC</u> ACTGGAGTTGTCCCAATTC |
| 4 | <i>GFP</i> RP Sense      | Template preparation for <i>In vitro</i> transcription | CGTGTCTTGTAGTTCCCGTC                                  |
| 5 | <i>GFP</i> FP Anti-Sense | Template preparation for <i>In vitro</i> transcription | CACTGGAGTTGTCCCAATTC                                  |
| 6 | <i>GFP</i> RP Anti-Sense | Template preparation for <i>In vitro</i> transcription | <u>GAAATTAATACGACTCACTATAGGGC</u> GTGTCTTGTAGTTCCCGTC |
| 7 | <i>MoDES1</i> FP         | Template preparation for <i>In vitro</i>               | <u>GAAATTAATACGACTCACTATAGGGC</u> GCTCGGGAAGCTTTT     |

|    | Sense                              | transcription                                                | CAAC                                                    |
|----|------------------------------------|--------------------------------------------------------------|---------------------------------------------------------|
| 8  | <i>MoDESI</i><br>RP Sense          | Template preparation<br>for <i>In vitro</i><br>transcription | GACGTCTTCCTTGATGCTC                                     |
| 9  | <i>MoDESI</i> FP<br>Anti-Sense     | Template preparation<br>for <i>In vitro</i><br>transcription | CGCTCGGGAAGCTTTTCAAC                                    |
| 10 | <i>MoDESI</i><br>RP Anti-<br>Sense | Template preparation<br>for <i>In vitro</i><br>transcription | <u>GAAATTAATACGACTCACTATAGGGGACGTCTTCCTTGATG</u><br>CTC |
| 11 | <i>MoACTIN</i><br>FP RT            | Reverse Transcription<br>PCR<br><br>Real Time qPCR           | GCGGTTACACCTTCTCTACCAC                                  |
| 12 | <i>MoACTIN</i><br>RP RT            | Reverse Transcription<br>PCR<br><br>Real Time qPCR           | AGTCTGATCTCCTGCTCAAAG                                   |
| 13 | <i>OsACTIN</i><br>FP RT            | Reverse Transcription<br>PCR<br><br>Real Time qPCR           | TGCTATGTACGTGCGCCATCCAG                                 |
| 14 | <i>OsACTIN</i><br>RP RT            | Reverse Transcription<br>PCR<br><br>Real Time qPCR           | AATGAGTAACCACGCTCCGTCA                                  |
| 15 | <i>OsPRIa</i> FP<br>RT             | Reverse Transcription<br>PCR<br><br>Real Time qPCR           | TGCTATGCTACGTGTTTATG                                    |
| 16 | <i>OsPRIa</i> RP<br>RT             | Reverse Transcription<br>PCR<br><br>Real Time qPCR           | AAATACGGCTGACAGTACAG                                    |
| 17 | <i>GFP</i> FP RT                   | Reverse Transcription<br>PCR                                 | AGGAGCGCACCATCTTCTTC                                    |

|    |                           |                                                    |                                 |
|----|---------------------------|----------------------------------------------------|---------------------------------|
|    |                           | Real Time qPCR                                     |                                 |
| 18 | <i>GFP RP RT</i>          | Reverse Transcription<br>PCR<br><br>Real Time qPCR | TTGTACTCCAGCTTGTGCCC            |
| 19 | <i>MoDESI<br/>FP RT</i>   | Reverse Transcription<br>PCR<br><br>Real Time qPCR | CGCTCGGGAAGCTTTTCAAC            |
| 20 | <i>MoDESI<br/>RP RT</i>   | Reverse Transcription<br>PCR<br><br>Real Time qPCR | GACGTCTTCCTTGATGCTC             |
| 21 | <i>25S rDNA<br/>FP RT</i> | Reverse Transcription<br>PCR<br><br>Real Time qPCR | ACATACTACTGCGTTCCGGC            |
| 22 | <i>25S rDNA<br/>RP RT</i> | Reverse Transcription<br>PCR<br><br>Real Time qPCR | CCATGCGCACAGGATTTTCAG           |
| 23 | <i>28S rDNA<br/>FP RT</i> | Reverse Transcription<br>PCR<br><br>Real Time qPCR | TACGAGAGGAACCGCTCATTTCAGATAATTA |
| 24 | <i>28S rDNA<br/>RP RT</i> | Reverse Transcription<br>PCR<br><br>Real Time qPCR | TCAGCAGATCGTAACGATAAAGCTACTC    |

**Supplementary Table 2.** The list of primers used in this study. The underlined sequences represent the T7 promoter sequence that was added to the primers for generation of Sense (S) and Anti-sense (AS) templates. These templates were used for *In vitro* transcription.

Sarkar and Roy-Barman, 2021

SIGS-mediated Fungal-Blast Resistance in Rice

**Target region from *GFP* sequence ( amplified from pCAMBIA1302) :**

-----  
CACTGGAGTTGTC**CCAATTC**TTGTTGAATTAGATGGTGTATGTTAATGGGCACAAATTTTCTGTCAGTGGAGAGGGTGAAGGTGA  
TGCAACATACGGAAAAC**TACCCTTAAATTTATTTGCACTACTGGAAAAC**TACCTGTTCCGTGGCCAACACTTGTCACTACTTTCT  
CTTATGGTGTTC**CAATGCTTTTCAAGATACCCAGATCATATGAAGCGGCACGACTTCTTCAAGAGCGCCATGCCTGAGGGATACG**  
TGCAGGAGAGGACCATCTTCTTCAAGGAC**GACGGGAACTACAAGACACG** -----  
-----  
-----

**Target region from *MoDESI* sequence ( amplified from *M.oryzae* b157 strain) :**

-----  
GTCGGGAAGCTTTT**CAAC**CTGACGGCCGGCAACAATGGCGACGACGCCACAGGTGCACAGGATCAAAGCTCAACATCTC  
CCTCACAGCTGATTTCAACCCTCGAGTCCGTCCAGGAGGACATACATACCCGCAACTTGCTATTCCCCGACGCCGAGTCTCT  
GTTTCAGCACCGCAACGATCAGGTCTTTCCACTTTTCGGCCGGTCCAGCTCTTCCGTTCGACGTCGACCGCTGTCAACTCTTT  
GACTATGACTGC**GACGTCTTCCTTGATGCTC** -----  
-----  
-----

**Supplementary Figure 1: Target regions from *GFP* and *MoDESI* chosen as template for *in vitro* transcription with Sense and Anti-sense pair of primers (in red font-colour).**

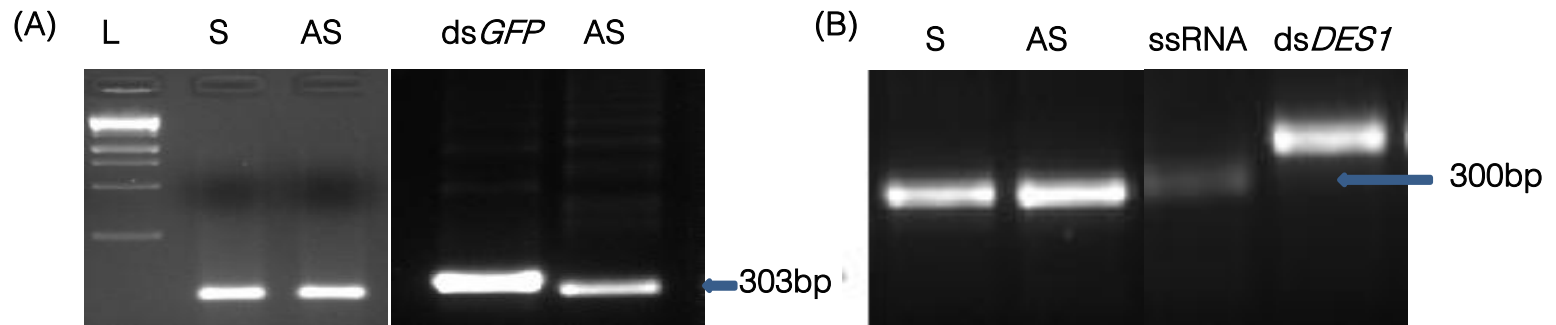

**Supplementary Figure 2. S (sense) and AS (anti-sense) ssRNA and purified dsRNA after *DNaseI* treatment.**  
**(A) The left gel is a 2% agarose gel showing ssRNA transcripts of *GFP*, and the right gel is also a 2% agarose gel, showing purified ds*GFP*. (B) The left gel is a 2% agarose gel showing ssRNA transcripts of *MoDESI*, and the right gel is a 2% agarose gel, showing purified ds*DESI*. The dsRNA appears a little higher than their corresponding ssRNAs as it has undergone annealing.**

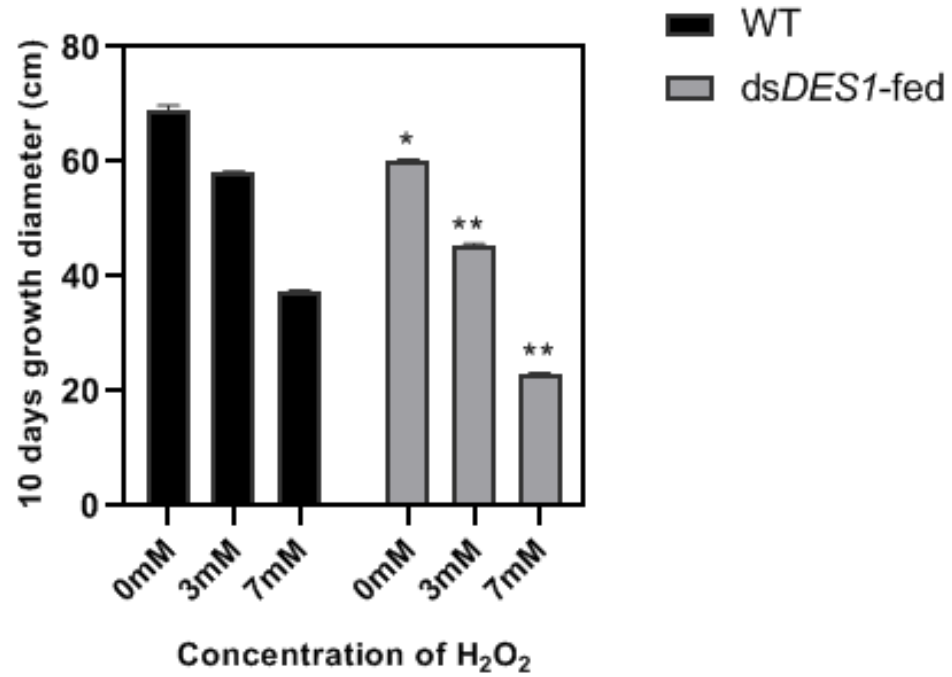

**Supplementary Figure 3. ROS sensitivity test. Growth of WT and dsDES1-fed strains on H<sub>2</sub>O<sub>2</sub>-amended complete media (CM).**



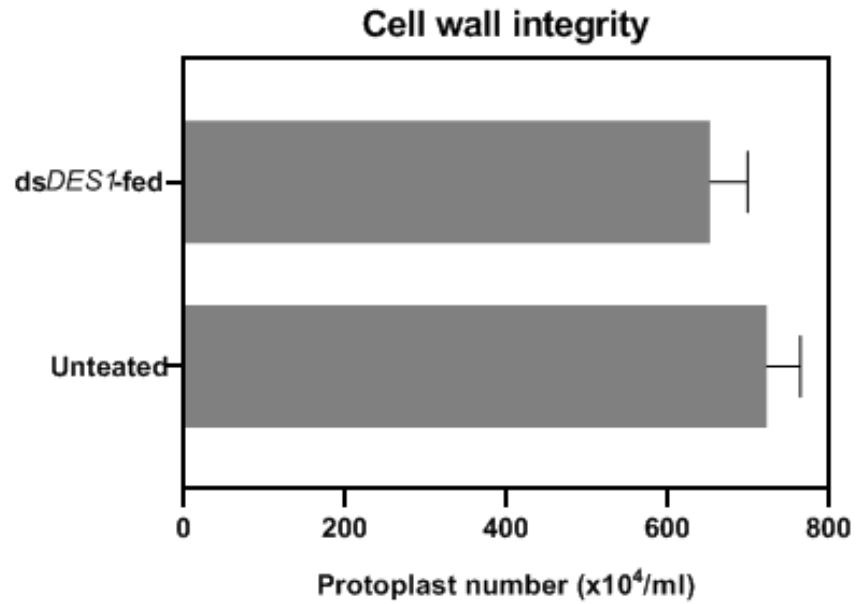

**Supplementary Figure 4. Protoplast assay for checking cell-wall integrity of WT and dsDES1-fed strains at 90 mins time point, post-lysis.**
